# Supplementary material for: Rheological transitions in FEM models of a block in matrix texture: From stable viscous to localized shear deformation
Source: Research Square preprint supplement (doi:10.21203/rs.3.rs-6722888/v1), 2025-06-06
Supplement: Supplementary file 1 [file d549c830eb890048e7a5d739.docx]

Supplementary materials

**Rheological transitions from stable flow to localized shear in FEM models for a block in matrix texture**

Yoshitaka Hashimoto1, Guanzhi Wang2, Jason P. Morgan2, 3 and Paola Vannucchi4

1 Department of the global environment and the disaster prevention, Faculty of Science and Technology, Kochi University, Kochi, Japan

2 Department of Marine Science and Engineering, Southern University of Science and Technology, Shenzhen, PR China

3 **Institut de Ciències del Mar** (ICM), The Spanish National Research Council (CSIC), Barcelona, Spain

4 Department of Earth Science, University of Florence, 50121 Florence, Italy

Supplementary Table S1: Table of test conditions

Supplementary Movie M1: The distributions of shear stress and strain rate over time for the stable viscous deformations

Supplementary Movie M2: The distributions of shear stress and strain rate over time for the localized shear with 1018 of matrix viscosity and 0.001 m/s of velocity boundary condition.

Supplementary Movie M3: The distributions of shear stress and strain rate over time for the localized shear with 1019 of matrix viscosity and 0.01 m/s of velocity boundary condition.

Supplementary Movie M4: the distributions of shear stress and strain rate over time for the transition mode with 1018 of matrix viscosity and 0.03 m/s of velocity boundary condition.
